# Supplementary material for: Synthesis and characterization of metal-containing poly(siloxane-urethane) crosslinked structures derived from siloxane diols and ferrocene diisocyanate
Source: Royal Society of Chemistry journal article supplement (doi:10.1039/c5ra15290a), 2015-01-01
Supplement: c5ra15290a1.pdf [file c5ra15290a1.pdf]

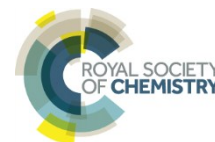

Journal Name

ARTICLE

Supplementary Information for:

**Synthesis and Characterization of Metal-Containing Poly(siloxane-urethane) Crosslinked Structures Derived from Siloxane Diols and Ferrocene Diisocyanate**

Mihaela Dascalu,\* Valentina E. Musteata, Loredana Vacareanu, Carmen Racles, Maria Cazacu

"Petru Poni" Institute of Macromolecular Chemistry, Aleea Gr. Ghica Voda 41 A, Iasi 700487, Romania

To whom correspondence will be addressed; e-mail: [amihaela@icmpp.ro](mailto:amihaela@icmpp.ro)

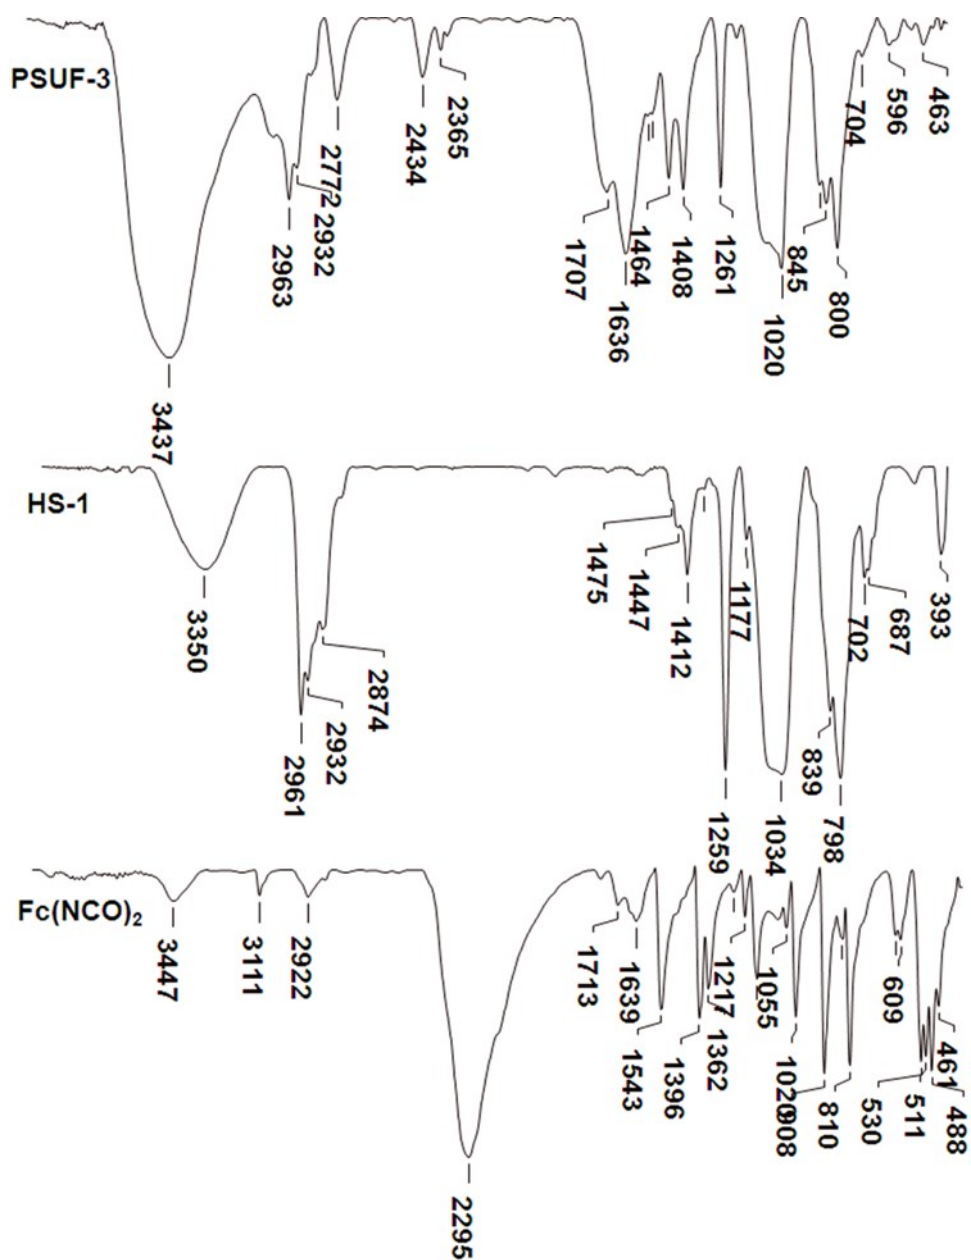

Figure 15. FTIR spectra for the reactants and PSUFs

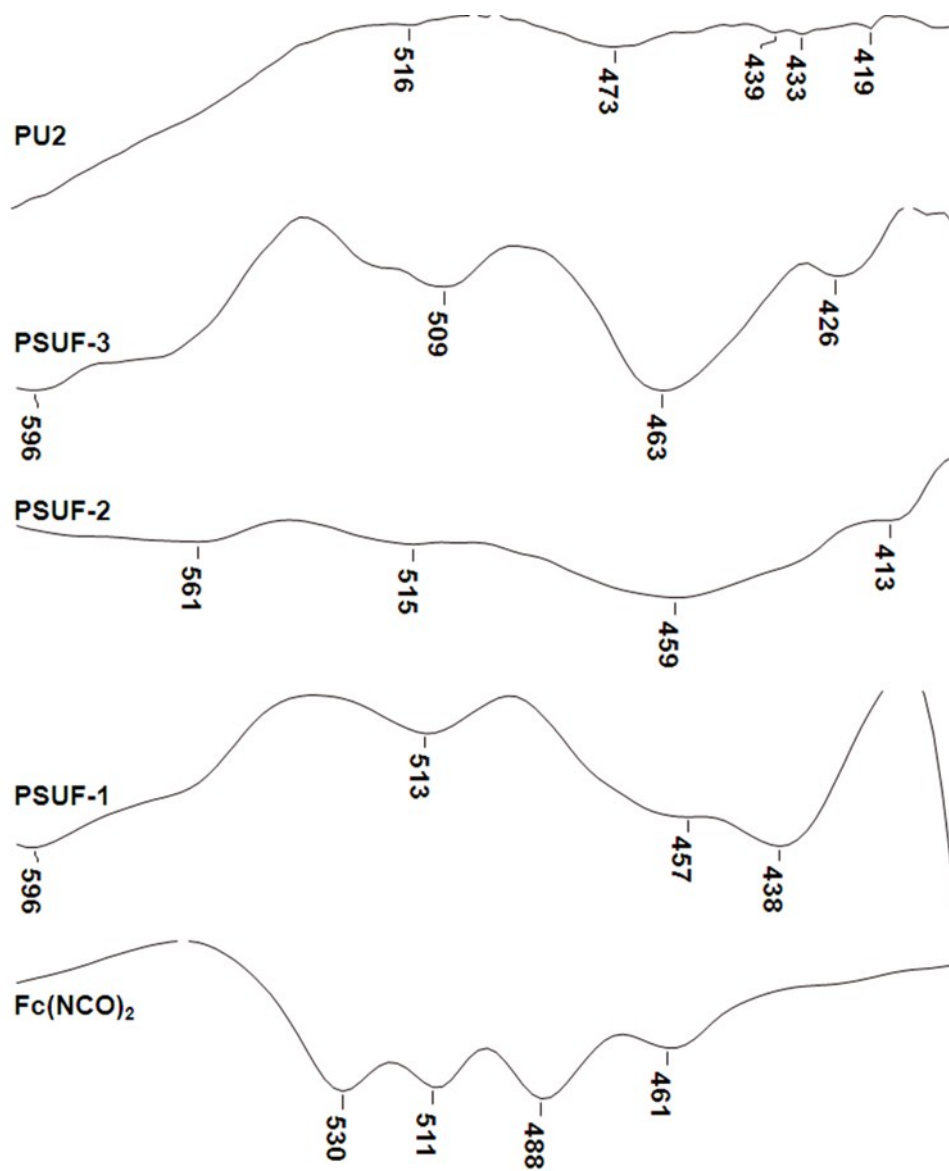

Figure 2S. FTIR spectra of Fc(NCO)<sub>2</sub>, the polymers based on it and PU2 ( in the 400-600 cm<sup>-1</sup> range)

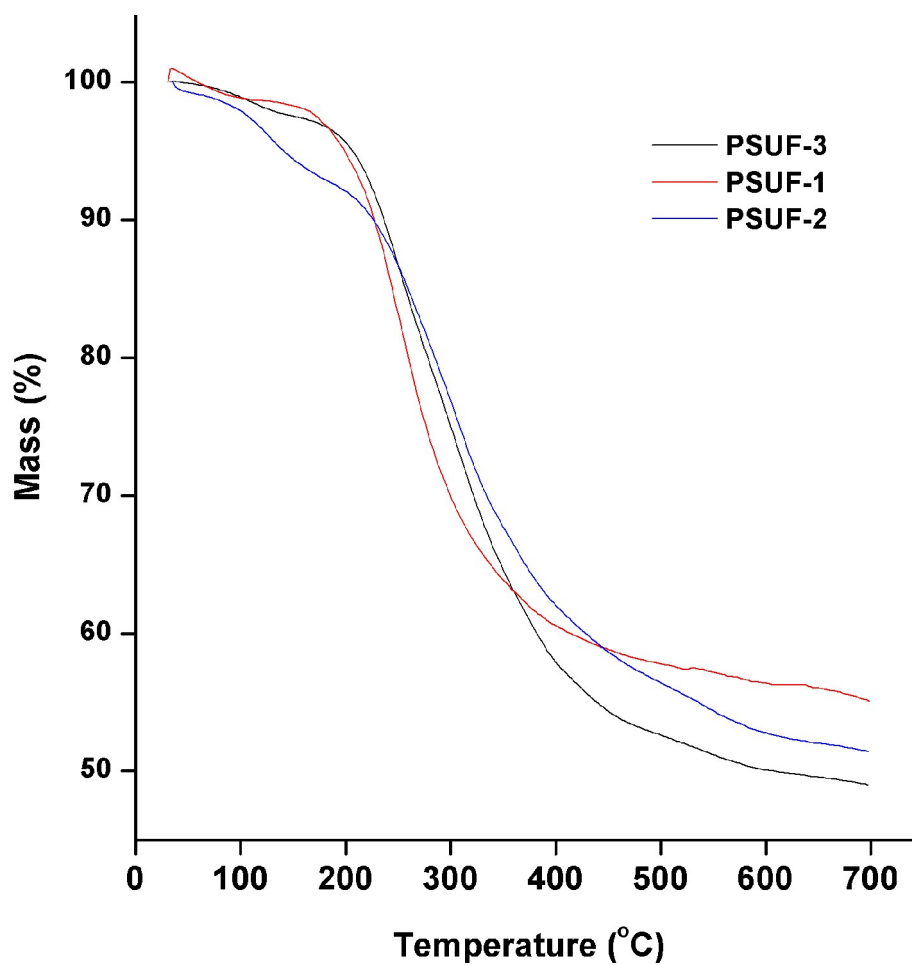

Figure 3S. The thermogravimetric analysis curves of PSUFs

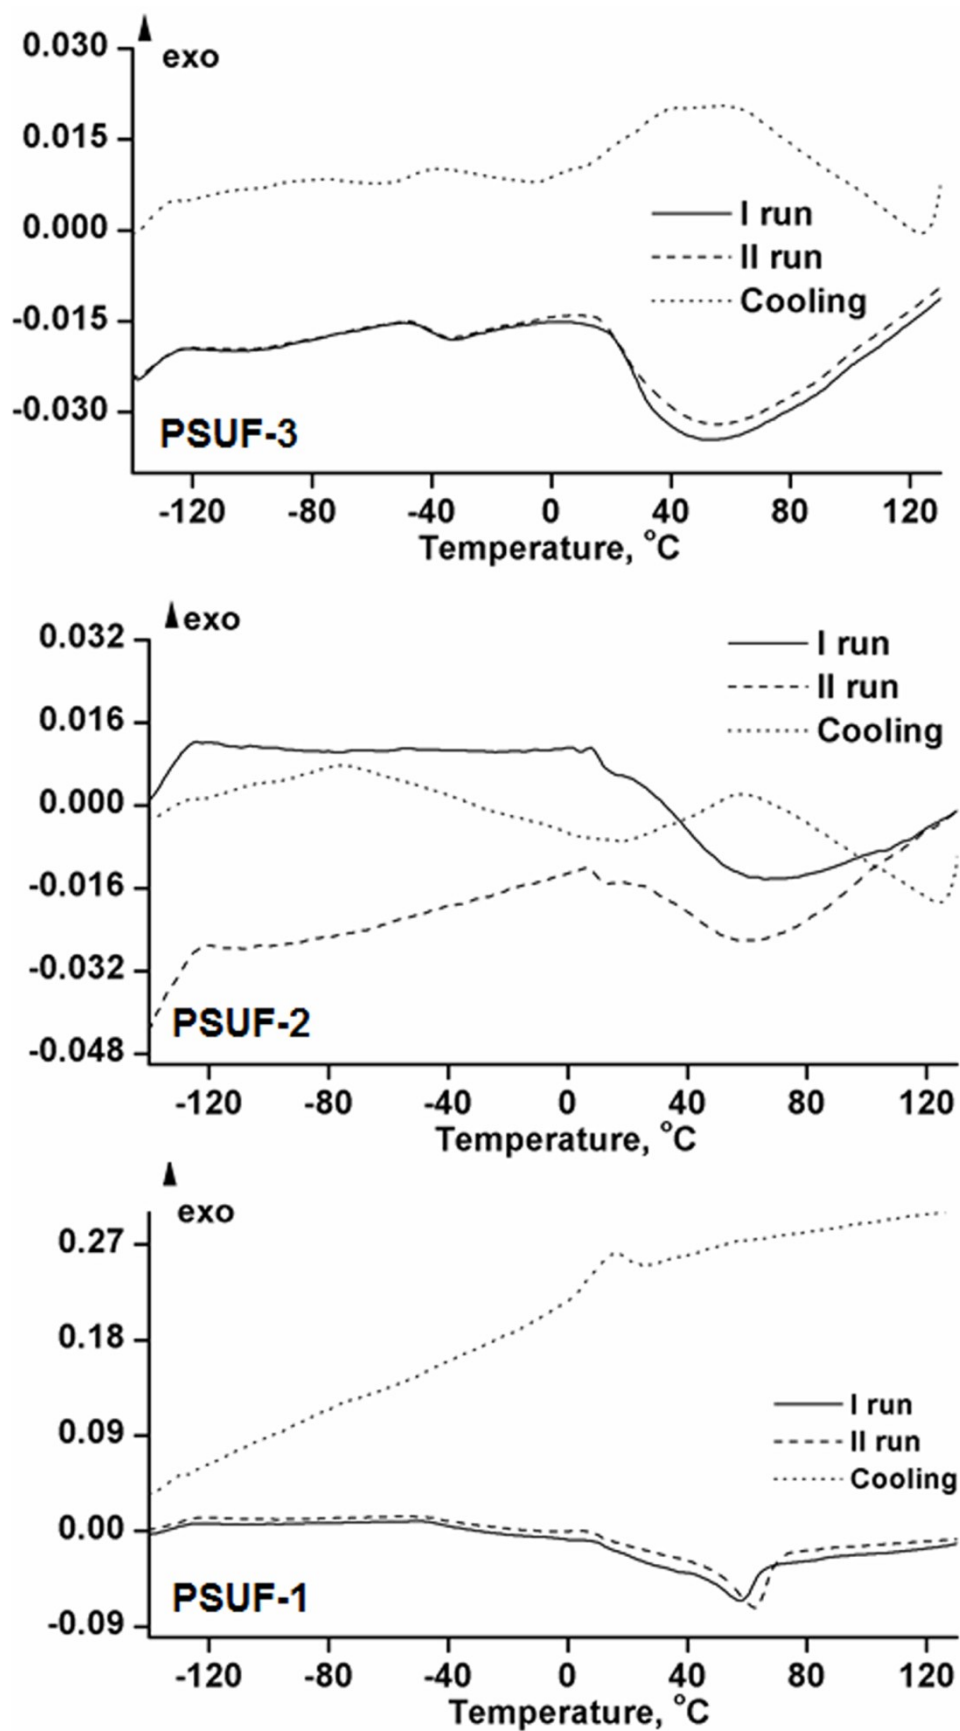

Figure 4S. The DSC curves of the PSUFs

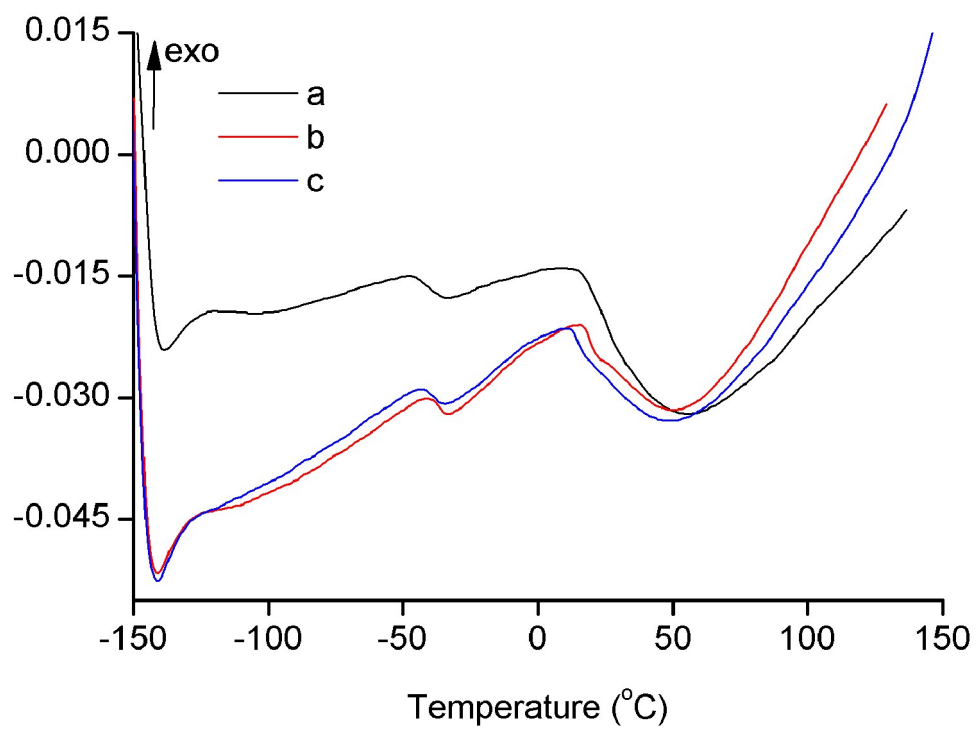

**Figure S5.** DSC curves (second heating) of sample PSUF-3: a- after 2 weeks of preparation, b- after 2 years of storing in lab. conditions, c- after 2 years, with shock cooling

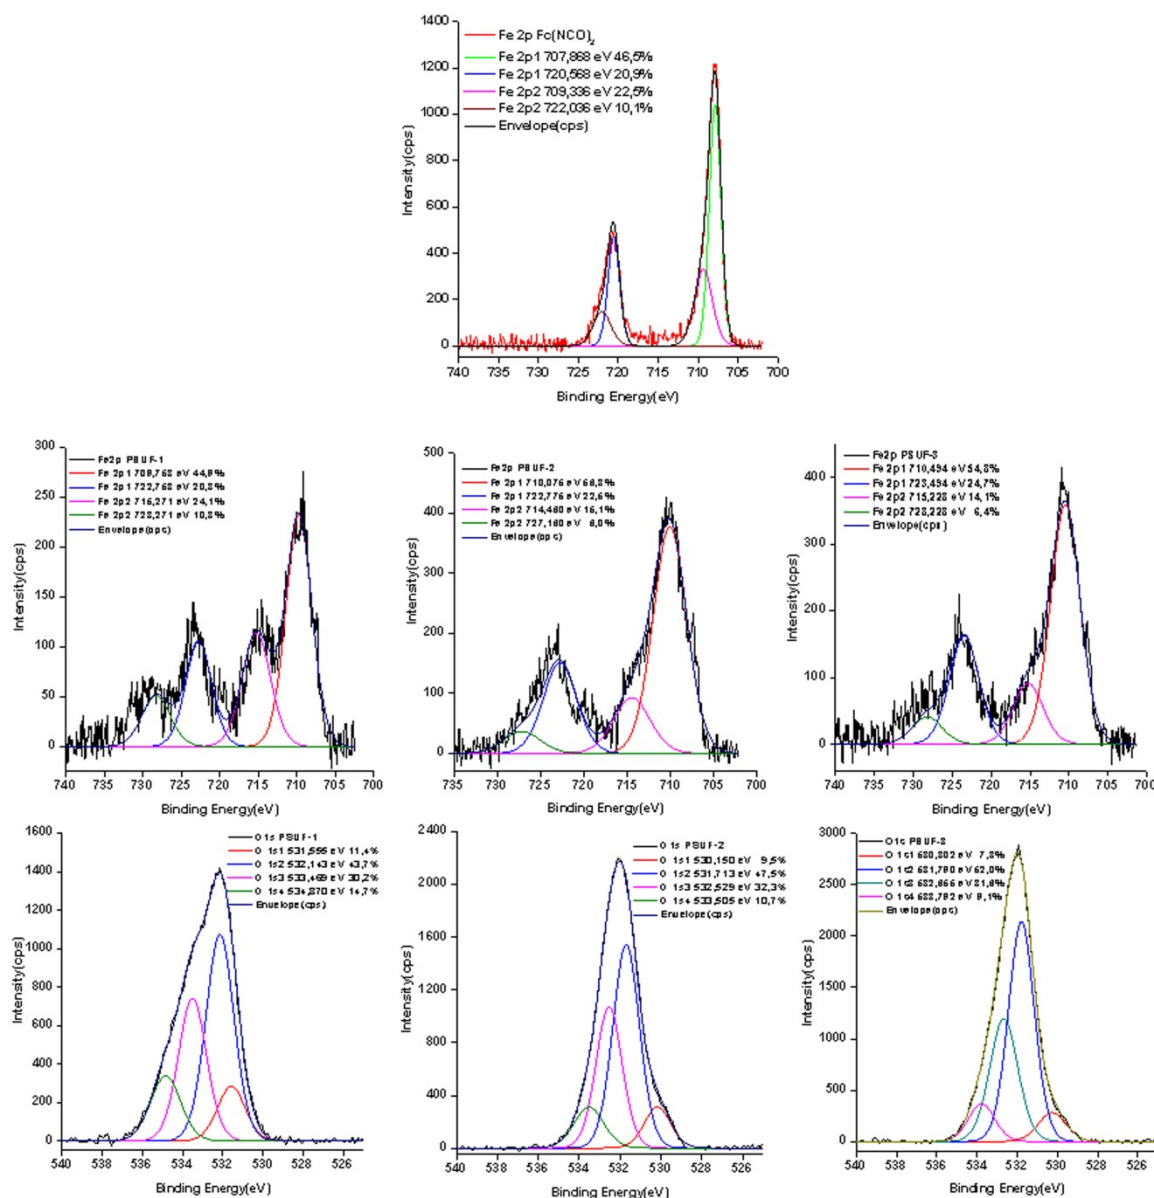

Figure 6S. Fe 2p high resolution spectra for Fc(NCO)<sub>2</sub> and PSUFs and O 1s spectrum of PSUFs

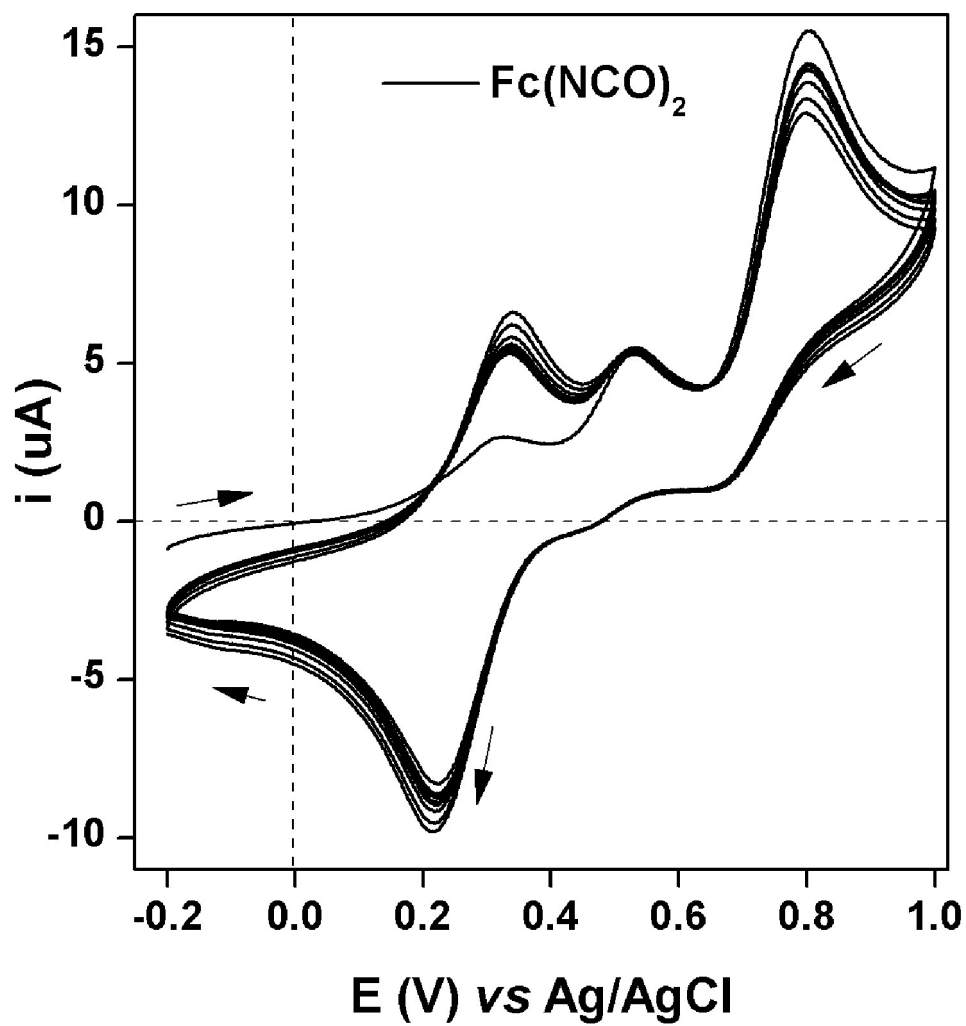

**Figure 7S.** Repetitive CVs recorded for  $\text{Fc}(\text{NCO})_2$ - chloroform solution containing  $\text{TBABF}_4$  as supporting electrolyte; scan rate = 50mV/s.
